# Supplementary material for: Temperature-dependent rate coefficients for the reactions of OH radicals with selected alkanes, aromatic compounds, and monoterpenes
Source: Copernicus journal article supplement (doi:10.5194/acp-24-13715-2024), 2024-12-12
Supplement: Supplementary file 1 [file acp-24-13715-2024-supplement.pdf]

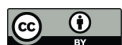

*Supplement of*

## **Temperature-dependent rate coefficients for the reactions of OH radicals with selected alkanes, aromatic compounds, and monoterpenes**

**Florian Berg et al.**

*Correspondence to:* Anna Novelli (a.novelli@fz-juelich.de) and Hendrik Fuchs (h.fuchs@fz-juelich.de)

The copyright of individual parts of the supplement might differ from the article licence.

**Table S1.** OH reaction rates of methane measured in this study.

| canister A      |                                      | canister B      |                                      |
|-----------------|--------------------------------------|-----------------|--------------------------------------|
| $T/K$           | $k/10^{-14}\text{cm}^3\text{s}^{-1}$ | $T/K$           | $k/10^{-14}\text{cm}^3\text{s}^{-1}$ |
| $340.3 \pm 0.6$ | $1.40 \pm 0.07$                      | $340.7 \pm 0.6$ | $1.32 \pm 0.06$                      |
| $331.1 \pm 0.5$ | $1.12 \pm 0.05$                      | $331.4 \pm 0.5$ | $1.14 \pm 0.05$                      |
| $321.7 \pm 0.5$ | $0.99 \pm 0.05$                      | $322.0 \pm 0.5$ | $0.96 \pm 0.04$                      |
| $312.4 \pm 0.4$ | $0.83 \pm 0.04$                      | $312.5 \pm 0.4$ | $0.84 \pm 0.04$                      |
| $303.1 \pm 0.4$ | $0.73 \pm 0.03$                      | $303.2 \pm 0.4$ | $0.71 \pm 0.03$                      |
| $293.8 \pm 0.5$ | $0.62 \pm 0.03$                      | $293.8 \pm 0.4$ | $0.60 \pm 0.03$                      |
| $286.0 \pm 0.6$ | $0.50 \pm 0.02$                      | $284.4 \pm 0.5$ | $0.48 \pm 0.03$                      |

**Table S2.** OH reaction rates of ethane measured in this study.

| canister A      |                                      | canister B      |                                      | canister C      |                                      |
|-----------------|--------------------------------------|-----------------|--------------------------------------|-----------------|--------------------------------------|
| $T/K$           | $k/10^{-13}\text{cm}^3\text{s}^{-1}$ | $T/K$           | $k/10^{-13}\text{cm}^3\text{s}^{-1}$ | $T/K$           | $k/10^{-13}\text{cm}^3\text{s}^{-1}$ |
| $340.2 \pm 0.6$ | $3.85 \pm 0.14$                      | $340.4 \pm 0.5$ | $3.84 \pm 0.08$                      | $340.4 \pm 0.6$ | $3.73 \pm 0.07$                      |
| $331.0 \pm 0.5$ | $3.66 \pm 0.21$                      | $331.0 \pm 0.5$ | $3.44 \pm 0.11$                      | $331.2 \pm 0.5$ | $3.41 \pm 0.12$                      |
| $321.7 \pm 0.4$ | $3.22 \pm 0.15$                      | $321.7 \pm 0.4$ | $3.14 \pm 0.09$                      | $321.8 \pm 0.4$ | $3.21 \pm 0.12$                      |
| $312.4 \pm 0.4$ | $3.07 \pm 0.15$                      | $312.3 \pm 0.4$ | $2.85 \pm 0.13$                      | $312.4 \pm 0.4$ | $2.94 \pm 0.08$                      |
|                 |                                      | $303.0 \pm 0.4$ | $2.62 \pm 0.11$                      | $303.1 \pm 0.4$ | $2.65 \pm 0.06$                      |
|                 |                                      | $293.7 \pm 0.5$ | $2.31 \pm 0.06$                      | $293.7 \pm 0.4$ | $2.36 \pm 0.04$                      |
|                 |                                      | $284.4 \pm 0.6$ | $2.06 \pm 0.05$                      | $284.6 \pm 0.5$ | $2.09 \pm 0.06$                      |

**Table S3.** OH reaction rates of propane measured in this study. Propane was sampled from the same canister in all measurements.

| series A        |                                      | series B        |                                      | series C        |                                      |
|-----------------|--------------------------------------|-----------------|--------------------------------------|-----------------|--------------------------------------|
| $T/K$           | $k/10^{-12}\text{cm}^3\text{s}^{-1}$ | $T/K$           | $k/10^{-12}\text{cm}^3\text{s}^{-1}$ | $T/K$           | $k/10^{-12}\text{cm}^3\text{s}^{-1}$ |
| $340.4 \pm 0.7$ | $1.46 \pm 0.05$                      | $339.9 \pm 0.7$ | $1.45 \pm 0.04$                      | $340.2 \pm 0.6$ | $1.52 \pm 0.07$                      |
| $331.2 \pm 0.5$ | $1.35 \pm 0.04$                      | $321.4 \pm 0.4$ | $1.26 \pm 0.03$                      | $331.0 \pm 0.4$ | $1.39 \pm 0.07$                      |
|                 |                                      |                 |                                      | $321.7 \pm 0.4$ | $1.30 \pm 0.07$                      |
| $312.2 \pm 0.4$ | $1.19 \pm 0.03$                      |                 |                                      | $312.4 \pm 0.4$ | $1.22 \pm 0.06$                      |
|                 |                                      | $302.8 \pm 0.5$ | $1.12 \pm 0.03$                      | $303.1 \pm 0.4$ | $1.16 \pm 0.06$                      |
|                 |                                      |                 |                                      | $293.7 \pm 0.5$ | $1.08 \pm 0.06$                      |
|                 |                                      |                 |                                      | $284.8 \pm 0.5$ | $1.01 \pm 0.06$                      |
| series D        |                                      | series E        |                                      |                 |                                      |
| $T/K$           | $k/10^{-12}\text{cm}^3\text{s}^{-1}$ | $T/K$           | $k/10^{-12}\text{cm}^3\text{s}^{-1}$ |                 |                                      |
| $340.4 \pm 0.6$ | $1.45 \pm 0.03$                      | $340.4 \pm 0.6$ | $1.47 \pm 0.05$                      |                 |                                      |
| $321.8 \pm 0.4$ | $1.29 \pm 0.04$                      | $321.7 \pm 0.4$ | $1.33 \pm 0.05$                      |                 |                                      |
| $303.0 \pm 0.4$ | $1.16 \pm 0.04$                      | $303.0 \pm 0.4$ | $1.17 \pm 0.03$                      |                 |                                      |
| $284.7 \pm 0.6$ | $0.99 \pm 0.04$                      | $284.4 \pm 0.6$ | $0.98 \pm 0.04$                      |                 |                                      |

**Table S4.** OH reaction rates of n-butane measured in this study.

| canister A      |                                      | canister B      |                                      | canister C      |                                      |
|-----------------|--------------------------------------|-----------------|--------------------------------------|-----------------|--------------------------------------|
| $T/K$           | $k/10^{-12}\text{cm}^3\text{s}^{-1}$ | $T/K$           | $k/10^{-12}\text{cm}^3\text{s}^{-1}$ | $T/K$           | $k/10^{-12}\text{cm}^3\text{s}^{-1}$ |
| $340.1 \pm 0.7$ | $2.82 \pm 0.11$                      | $340.3 \pm 0.6$ | $2.98 \pm 0.08$                      | $340.5 \pm 0.6$ | $3.17 \pm 0.08$                      |
| $331.1 \pm 0.6$ | $2.84 \pm 0.07$                      | $331.2 \pm 0.5$ | $2.88 \pm 0.08$                      | $331.3 \pm 0.4$ | $2.98 \pm 0.12$                      |
| $321.9 \pm 0.5$ | $2.71 \pm 0.06$                      | $321.8 \pm 0.4$ | $2.80 \pm 0.06$                      | $322.0 \pm 0.4$ | $3.08 \pm 0.14$                      |
| $312.5 \pm 0.4$ | $2.60 \pm 0.07$                      | $312.5 \pm 0.4$ | $2.67 \pm 0.07$                      | $312.6 \pm 0.4$ | $2.78 \pm 0.11$                      |
| $303.1 \pm 0.4$ | $2.55 \pm 0.05$                      | $303.1 \pm 0.4$ | $2.60 \pm 0.05$                      | $303.2 \pm 0.4$ | $2.58 \pm 0.09$                      |
| $293.9 \pm 0.5$ | $2.43 \pm 0.04$                      | $293.7 \pm 0.5$ | $2.52 \pm 0.06$                      | $293.8 \pm 0.4$ | $2.56 \pm 0.14$                      |
| $285.3 \pm 0.6$ | $2.29 \pm 0.05$                      | $284.5 \pm 0.5$ | $2.33 \pm 0.06$                      |                 |                                      |

**Table S5.** OH reaction rates of methyl vinyl ketone (MVK) measured in this study.

| canister A      |                                      | canister B      |                                      | canister C      |                                      |
|-----------------|--------------------------------------|-----------------|--------------------------------------|-----------------|--------------------------------------|
| $T/K$           | $k/10^{-11}\text{cm}^3\text{s}^{-1}$ | $T/K$           | $k/10^{-11}\text{cm}^3\text{s}^{-1}$ | $T/K$           | $k/10^{-11}\text{cm}^3\text{s}^{-1}$ |
| $340.6 \pm 0.5$ | $1.51 \pm 0.03$                      | $340.4 \pm 0.5$ | $1.58 \pm 0.04$                      | $340.5 \pm 0.5$ | $1.53 \pm 0.04$                      |
| $331.3 \pm 0.5$ | $1.62 \pm 0.04$                      | $331.3 \pm 0.5$ | $1.69 \pm 0.04$                      | $331.3 \pm 0.5$ | $1.67 \pm 0.05$                      |
| $321.9 \pm 0.4$ | $1.72 \pm 0.05$                      | $321.8 \pm 0.4$ | $1.80 \pm 0.04$                      | $321.9 \pm 0.4$ | $1.78 \pm 0.04$                      |
| $312.5 \pm 0.4$ | $1.84 \pm 0.05$                      | $312.5 \pm 0.4$ | $1.93 \pm 0.05$                      | $312.5 \pm 0.4$ | $1.91 \pm 0.06$                      |
| $303.1 \pm 0.4$ | $1.99 \pm 0.04$                      | $303.1 \pm 0.4$ | $2.05 \pm 0.05$                      | $303.1 \pm 0.4$ | $1.98 \pm 0.04$                      |
| $293.8 \pm 0.5$ | $2.15 \pm 0.05$                      | $293.8 \pm 0.4$ | $2.26 \pm 0.06$                      | $293.8 \pm 0.5$ | $2.21 \pm 0.05$                      |
| $285.2 \pm 0.5$ | $2.21 \pm 0.11$                      | $284.5 \pm 0.5$ | $2.35 \pm 0.06$                      | $284.7 \pm 0.5$ | $2.42 \pm 0.06$                      |

**Table S6.** OH reaction rates of myrcene measured in this study.

| canister A      |                                      | canister B      |                                      | canister C      |                                      |
|-----------------|--------------------------------------|-----------------|--------------------------------------|-----------------|--------------------------------------|
| $T/K$           | $k/10^{-10}\text{cm}^3\text{s}^{-1}$ | $T/K$           | $k/10^{-10}\text{cm}^3\text{s}^{-1}$ | $T/K$           | $k/10^{-10}\text{cm}^3\text{s}^{-1}$ |
| $340.5 \pm 0.6$ | $1.14 \pm 0.04$                      | $340.6 \pm 0.5$ | $1.20 \pm 0.02$                      | $340.7 \pm 0.5$ | $1.17 \pm 0.03$                      |
| $331.3 \pm 0.4$ | $1.25 \pm 0.03$                      | $331.3 \pm 0.4$ | $1.32 \pm 0.03$                      | $331.4 \pm 0.4$ | $1.33 \pm 0.04$                      |
| $321.9 \pm 0.4$ | $1.40 \pm 0.03$                      | $322.0 \pm 0.4$ | $1.46 \pm 0.07$                      | $322.1 \pm 0.4$ | $1.42 \pm 0.06$                      |
| $312.6 \pm 0.4$ | $1.53 \pm 0.04$                      | $312.6 \pm 0.4$ | $1.57 \pm 0.04$                      | $312.8 \pm 0.4$ | $1.51 \pm 0.05$                      |
| $303.1 \pm 0.4$ | $1.64 \pm 0.04$                      | $303.3 \pm 0.4$ | $1.62 \pm 0.05$                      | $303.3 \pm 0.4$ | $1.68 \pm 0.07$                      |
| $293.8 \pm 0.5$ | $1.77 \pm 0.03$                      | $293.9 \pm 0.5$ | $1.76 \pm 0.06$                      | $293.9 \pm 0.5$ | $1.73 \pm 0.04$                      |
| $284.5 \pm 0.6$ | $1.99 \pm 0.06$                      | $284.8 \pm 0.5$ | $1.92 \pm 0.07$                      | $285.4 \pm 0.5$ | $1.88 \pm 0.07$                      |

**Table S7.** OH reaction rates of  $\Delta^3$ -carene measured in this study.

| canister A      |                                      | canister B      |                                      | canister C      |                                      |
|-----------------|--------------------------------------|-----------------|--------------------------------------|-----------------|--------------------------------------|
| $T/K$           | $k/10^{-11}\text{cm}^3\text{s}^{-1}$ | $T/K$           | $k/10^{-11}\text{cm}^3\text{s}^{-1}$ | $T/K$           | $k/10^{-11}\text{cm}^3\text{s}^{-1}$ |
| $340.8 \pm 0.6$ | $7.3 \pm 0.3$                        | $340.6 \pm 0.5$ | $7.53 \pm 0.17$                      | $340.6 \pm 0.6$ | $7.65 \pm 0.13$                      |
| $331.4 \pm 0.5$ | $7.25 \pm 0.14$                      | $331.2 \pm 0.5$ | $7.33 \pm 0.13$                      | $331.3 \pm 0.5$ | $7.54 \pm 0.17$                      |
| $322.0 \pm 0.4$ | $7.43 \pm 0.17$                      | $321.9 \pm 0.4$ | $7.76 \pm 0.15$                      | $321.9 \pm 0.4$ | $7.6 \pm 0.3$                        |
| $312.6 \pm 0.4$ | $7.55 \pm 0.14$                      | $312.5 \pm 0.4$ | $8.02 \pm 0.16$                      | $312.5 \pm 0.4$ | $8.1 \pm 0.3$                        |
| $303.3 \pm 0.4$ | $7.79 \pm 0.15$                      | $303.1 \pm 0.4$ | $8.29 \pm 0.17$                      | $303.2 \pm 0.4$ | $8.2 \pm 0.2$                        |
| $293.9 \pm 0.4$ | $8.29 \pm 0.16$                      | $293.9 \pm 0.4$ | $8.7 \pm 0.3$                        | $293.8 \pm 0.4$ | $8.69 \pm 0.16$                      |
| $284.5 \pm 0.5$ | $8.5 \pm 0.3$                        | $284.4 \pm 0.5$ | $9.3 \pm 0.3$                        | $284.5 \pm 0.5$ | $9.0 \pm 0.6$                        |

**Table S8.** OH reaction rates of  $\gamma$ -terpinene measured in this study.

| canister A  |                                      | canister B  |                                      | canister C  |                                      |
|-------------|--------------------------------------|-------------|--------------------------------------|-------------|--------------------------------------|
| $T/K$       | $k/10^{-10}\text{cm}^3\text{s}^{-1}$ | $T/K$       | $k/10^{-10}\text{cm}^3\text{s}^{-1}$ | $T/K$       | $k/10^{-10}\text{cm}^3\text{s}^{-1}$ |
| 340.5 ± 0.5 | 1.06 ± 0.02                          | 340.5 ± 0.5 | 1.06 ± 0.03                          | 340.4 ± 0.5 | 1.10 ± 0.03                          |
| 331.2 ± 0.4 | 1.21 ± 0.03                          | 331.1 ± 0.4 | 1.22 ± 0.03                          | 331.2 ± 0.5 | 1.25 ± 0.03                          |
| 321.9 ± 0.4 | 1.34 ± 0.04                          | 321.8 ± 0.4 | 1.29 ± 0.04                          | 321.9 ± 0.4 | 1.36 ± 0.03                          |
| 312.5 ± 0.4 | 1.42 ± 0.03                          | 312.5 ± 0.4 | 1.45 ± 0.03                          | 312.4 ± 0.4 | 1.48 ± 0.05                          |
| 303.1 ± 0.4 | 1.61 ± 0.03                          | 303.1 ± 0.4 | 1.51 ± 0.03                          | 303.1 ± 0.4 | 1.56 ± 0.04                          |
| 293.9 ± 0.4 | 1.68 ± 0.03                          | 293.7 ± 0.5 | 1.65 ± 0.03                          | 293.8 ± 0.4 | 1.67 ± 0.04                          |
| 284.6 ± 0.5 | 1.77 ± 0.05                          | 284.5 ± 0.5 | 1.97 ± 0.05                          | 284.5 ± 0.5 | 1.86 ± 0.05                          |

**Table S9.** OH reaction rates of toluene measured in this study.

| canister A  |                                      | canister B  |                                      | canister C  |                                      |
|-------------|--------------------------------------|-------------|--------------------------------------|-------------|--------------------------------------|
| $T/K$       | $k/10^{-12}\text{cm}^3\text{s}^{-1}$ | $T/K$       | $k/10^{-12}\text{cm}^3\text{s}^{-1}$ | $T/K$       | $k/10^{-12}\text{cm}^3\text{s}^{-1}$ |
| 340.5 ± 0.5 | 4.73 ± 0.11                          | 340.4 ± 0.5 | 4.62 ± 0.15                          | 340.5 ± 0.5 | 4.77 ± 0.11                          |
| 331.1 ± 0.5 | 5.13 ± 0.13                          | 331.2 ± 0.5 | 5.03 ± 0.10                          | 331.2 ± 0.5 | 5.12 ± 0.16                          |
| 321.8 ± 0.4 | 5.36 ± 0.12                          | 321.8 ± 0.4 | 5.54 ± 0.18                          | 321.9 ± 0.4 | 5.44 ± 0.14                          |
| 312.4 ± 0.4 | 5.58 ± 0.15                          | 312.5 ± 0.4 | 5.77 ± 0.20                          | 312.6 ± 0.4 | 5.63 ± 0.24                          |
| 303.2 ± 0.4 | 5.77 ± 0.09                          | 303.2 ± 0.4 | 6.09 ± 0.18                          | 303.2 ± 0.4 | 5.87 ± 0.14                          |
| 293.9 ± 0.4 | 6.01 ± 0.11                          | 293.8 ± 0.4 | 6.11 ± 0.31                          | 293.8 ± 0.4 | 6.01 ± 0.14                          |
| 284.5 ± 0.5 | 6.14 ± 0.11                          | 284.5 ± 0.5 | 6.08 ± 0.23                          | 285.5 ± 0.5 | 5.90 ± 0.18                          |

**Table S10.** OH reaction rates of mesitylene measured in this study.

| canister A  |                                      | canister B  |                                      | canister C  |                                      |
|-------------|--------------------------------------|-------------|--------------------------------------|-------------|--------------------------------------|
| $T/K$       | $k/10^{-11}\text{cm}^3\text{s}^{-1}$ | $T/K$       | $k/10^{-11}\text{cm}^3\text{s}^{-1}$ | $T/K$       | $k/10^{-11}\text{cm}^3\text{s}^{-1}$ |
| 340.6 ± 0.5 | 3.99 ± 0.08                          | 340.5 ± 0.5 | 4.03 ± 0.08                          | 340.5 ± 0.6 | 4.06 ± 0.12                          |
| 331.1 ± 0.4 | 4.35 ± 0.09                          | 331.2 ± 0.4 | 4.48 ± 0.09                          | 331.3 ± 0.4 | 4.56 ± 0.09                          |
| 321.8 ± 0.4 | 4.92 ± 0.13                          | 321.8 ± 0.4 | 4.85 ± 0.10                          | 321.9 ± 0.4 | 4.98 ± 0.11                          |
| 312.5 ± 0.4 | 5.25 ± 0.11                          | 312.4 ± 0.4 | 5.28 ± 0.12                          | 312.5 ± 0.4 | 5.37 ± 0.13                          |
| 303.1 ± 0.4 | 5.57 ± 0.17                          | 303.2 ± 0.4 | 5.69 ± 0.10                          | 303.1 ± 0.4 | 5.77 ± 0.10                          |
| 293.8 ± 0.4 | 6.41 ± 0.16                          | 293.9 ± 0.4 | 6.17 ± 0.15                          | 293.8 ± 0.4 | 6.27 ± 0.14                          |
| 284.5 ± 0.5 | 6.64 ± 0.12                          | 284.6 ± 0.5 | 6.63 ± 0.13                          | 284.6 ± 0.5 | 6.65 ± 0.17                          |

**Table S11.** OH reaction rates of m-xylene measured in this study.

| canister A  |                                      | canister B  |                                      | canister C  |                                      |
|-------------|--------------------------------------|-------------|--------------------------------------|-------------|--------------------------------------|
| $T/K$       | $k/10^{-11}\text{cm}^3\text{s}^{-1}$ | $T/K$       | $k/10^{-11}\text{cm}^3\text{s}^{-1}$ | $T/K$       | $k/10^{-11}\text{cm}^3\text{s}^{-1}$ |
| 340.5 ± 0.5 | 1.66 ± 0.04                          | 340.4 ± 0.5 | 1.72 ± 0.06                          | 340.6 ± 0.5 | 1.70 ± 0.06                          |
| 331.2 ± 0.5 | 1.80 ± 0.05                          | 331.3 ± 0.4 | 1.92 ± 0.05                          | 331.5 ± 0.4 | 1.94 ± 0.06                          |
| 321.8 ± 0.4 | 2.01 ± 0.05                          | 321.9 ± 0.4 | 2.05 ± 0.05                          | 322.2 ± 0.4 | 2.03 ± 0.08                          |
| 312.5 ± 0.4 | 2.16 ± 0.06                          | 312.5 ± 0.4 | 2.22 ± 0.05                          | 312.8 ± 0.4 | 2.22 ± 0.09                          |
| 303.1 ± 0.4 | 2.41 ± 0.06                          | 303.2 ± 0.4 | 2.37 ± 0.06                          | 303.2 ± 0.4 | 2.30 ± 0.06                          |
| 293.9 ± 0.5 | 2.62 ± 0.07                          | 293.9 ± 0.4 | 2.60 ± 0.04                          | 294.1 ± 0.4 | 2.56 ± 0.07                          |
| 285.0 ± 0.5 | 2.79 ± 0.11                          | 285.0 ± 0.6 | 2.72 ± 0.07                          |             |                                      |

**Table S12.** OH reaction rates of o-xylene measured in this study.

| canister A      |                                      | canister B      |                                      | canister C      |                                      |
|-----------------|--------------------------------------|-----------------|--------------------------------------|-----------------|--------------------------------------|
| $T/K$           | $k/10^{-11}\text{cm}^3\text{s}^{-1}$ | $T/K$           | $k/10^{-11}\text{cm}^3\text{s}^{-1}$ | $T/K$           | $k/10^{-11}\text{cm}^3\text{s}^{-1}$ |
| $340.5 \pm 0.5$ | $1.05 \pm 0.03$                      | $340.6 \pm 0.6$ | $1.06 \pm 0.03$                      | $340.6 \pm 0.6$ | $1.03 \pm 0.03$                      |
| $331.3 \pm 0.4$ | $1.13 \pm 0.04$                      | $331.3 \pm 0.5$ | $1.13 \pm 0.03$                      |                 |                                      |
| $321.9 \pm 0.4$ | $1.22 \pm 0.04$                      | $321.9 \pm 0.4$ | $1.22 \pm 0.03$                      | $322.1 \pm 0.4$ | $1.16 \pm 0.03$                      |
| $312.5 \pm 0.4$ | $1.28 \pm 0.03$                      | $312.6 \pm 0.4$ | $1.28 \pm 0.04$                      | $312.7 \pm 0.4$ | $1.29 \pm 0.04$                      |
| $303.1 \pm 0.4$ | $1.34 \pm 0.03$                      | $303.2 \pm 0.4$ | $1.34 \pm 0.03$                      | $303.4 \pm 0.4$ | $1.31 \pm 0.04$                      |
| $293.8 \pm 0.4$ | $1.43 \pm 0.03$                      | $293.9 \pm 0.4$ | $1.43 \pm 0.03$                      | $294.0 \pm 0.5$ | $1.40 \pm 0.04$                      |
| $285.1 \pm 0.5$ | $1.44 \pm 0.05$                      | $285.6 \pm 0.5$ | $1.43 \pm 0.05$                      | $286.2 \pm 0.5$ | $1.41 \pm 0.06$                      |
